# Supplementary material
Source: publisher figshare collection journal article supplement (https://acs.figshare.com/ndownloader/files/4526005)
Supplement: Supplementary file 1 [file 4526005]

*Supporting Information*

# Population Analysis of Structural Properties of Giant Liposomes by Flow Cytometry

*Kazuya Nishimura<sup>†</sup>, Tomohiro Hosoi<sup>‡</sup>, Takeshi Sunami<sup>§</sup>, Taro Toyota<sup>‡</sup>, Masanori*

*Fujinami<sup>‡</sup>, Koichi Oguma<sup>‡</sup>, Tomoaki Matsuura<sup>†</sup>, Hiroaki Suzuki<sup>†</sup>, Tetsuya Yomo<sup>†,§,□,\*</sup>*

<sup>†</sup>Department of Bioinformatic Engineering, Graduate School of Information Science and Technology, Osaka University, 2-1 Yamadaoka, Suita, Osaka 565-0871, Japan

<sup>‡</sup>Department of Applied Chemistry and Biotechnology, Graduate School of Engineering, Chiba University, 1-33 Yayoi-cho, Inage, Chiba 263-8522, Japan

<sup>§</sup>ERATO Complex Systems Biology Project, Japan Science and Technology Agency (JST), 3-8-1 Komaba, Meguro-ku, Tokyo 153-8902, Japan

<sup>□</sup>Graduate School of Frontier Biosciences, Osaka University, 1-3 Yamadaoka, Suita, Osaka 565-0871, Japan

\* To whom correspondence should be addressed.

Tel: +81-6-6879-4171

Fax: +81-6-6879-7433

E-mail: yomo@ist.osaka-u.ac.jp.

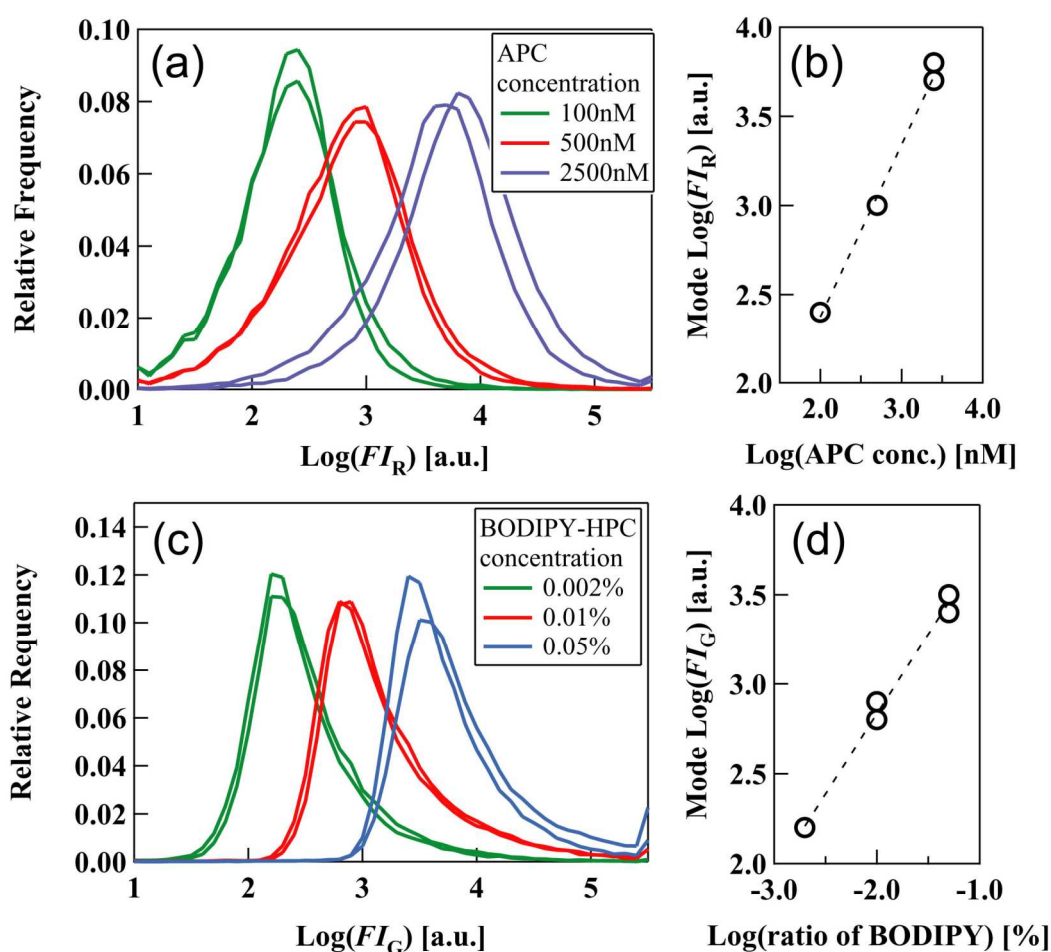

**Figure S1.** (a) Relative frequency distributions of red fluorescent intensity ( $FI_R$ ) representing the liposome inner volume encapsulating different concentrations of APC. Two lines in the same color represent the two independent measurements with identical conditions. (b) Mode value of the distribution of  $FI_R$  for different APC concentrations. (c) Relative frequency distributions of green fluorescent intensity ( $FI_G$ ) representing the membrane quantity containing BODIPY-HPC at different molar ratios. Two lines in the same color represent the two independent measurements with identical conditions. (d) Mode value of the distribution of  $FI_G$  for different BODIPY-HPC concentrations. All data were obtained with liposomes formed by the gentle hydration method. For both fluorescent markers, duplicated results agreed well (Figures S1 a, c), indicating the liposome formation was reproducible. The most frequent value of the fluorescent intensity varied in proportion to the loaded amount of marker fluorescent molecules (Figures S1 b, d), indicating the volume and the membrane quantity can be properly quantified in this range. We chose the marker concentrations which give the intensities in the middle of the linear range of flow cytometry (500 nM APC and 0.01% BODIPY-HPC.)

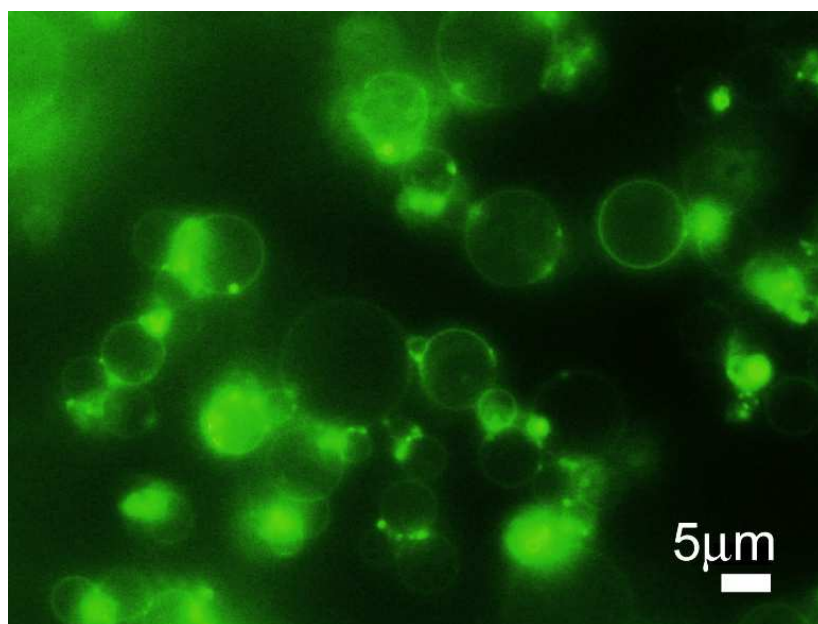

**Figure S2.** Fluorescent microscopic image of the liposomes formed by w/o emulsion method (POPC: POPG: Cholesterol=75:8:17) obtained by using oil-immersion x100 objective lens (N.A. =1.4).
